# Supplementary material
Source: PubMed Central journal article supplement (PMC6453737)
Supplement: NIHMS1522088-supplement-Supplemental_Publication_Material.pdf [file NIHMS1522088-supplement-Supplemental_Publication_Material.pdf]

## **SUPPLEMENTAL MATERIAL**

Supplemental Figure 1. Average annual concentration levels for PM<sub>2.5</sub> and NO<sub>2</sub> over time (1994-2010) by NIH-AARP study state

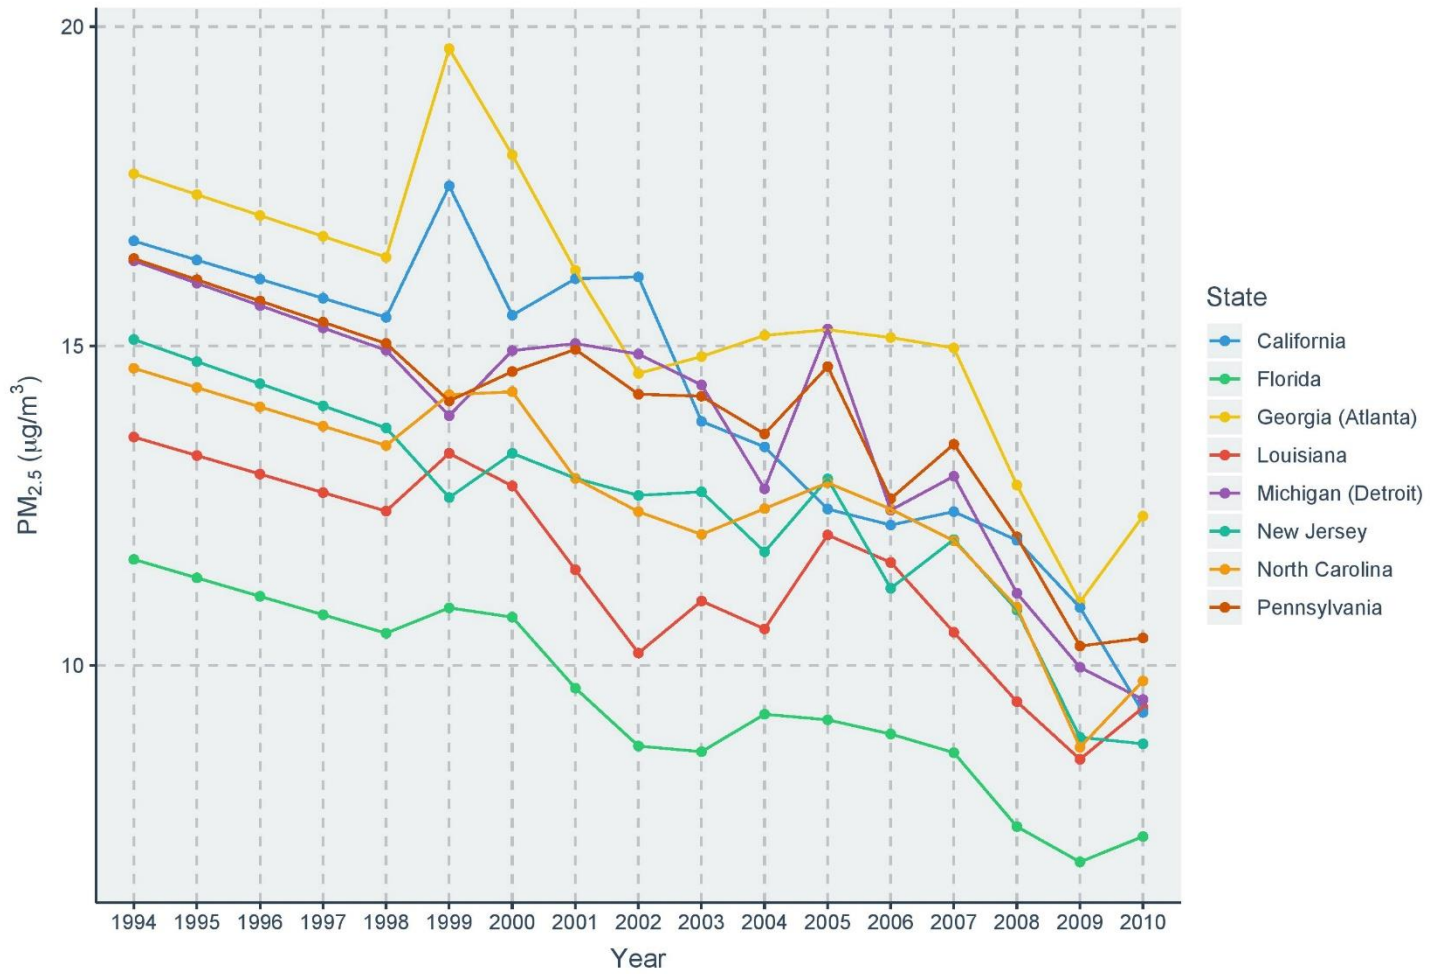

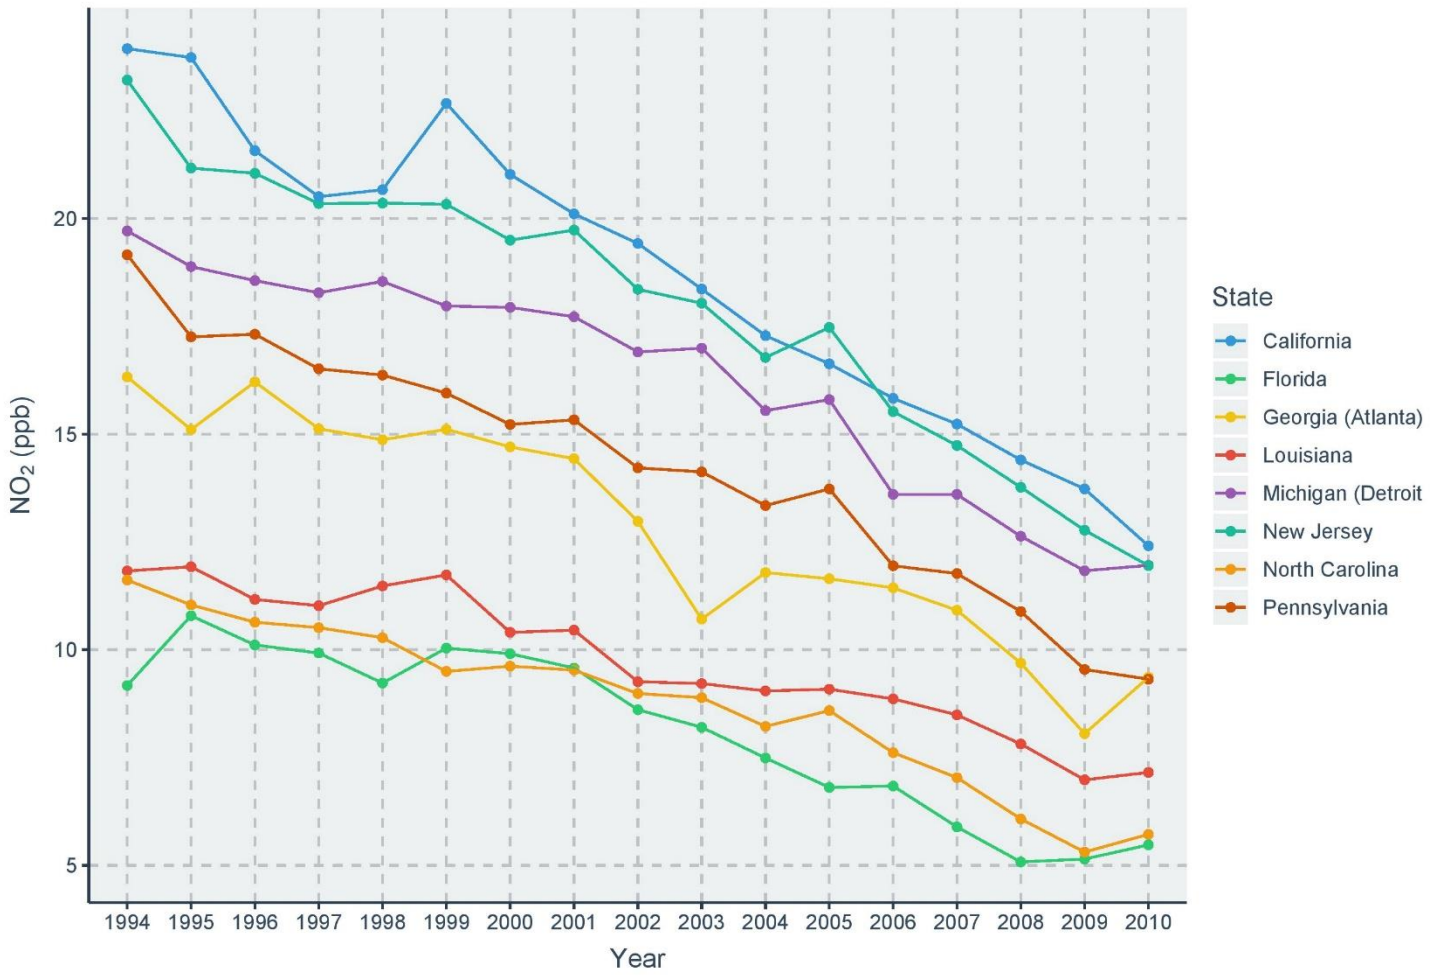

Supplemental Figure 2. HR and 95% CI associated with air pollutants by quintiles of alternative Mediterranean Diet Index (aMED) score components

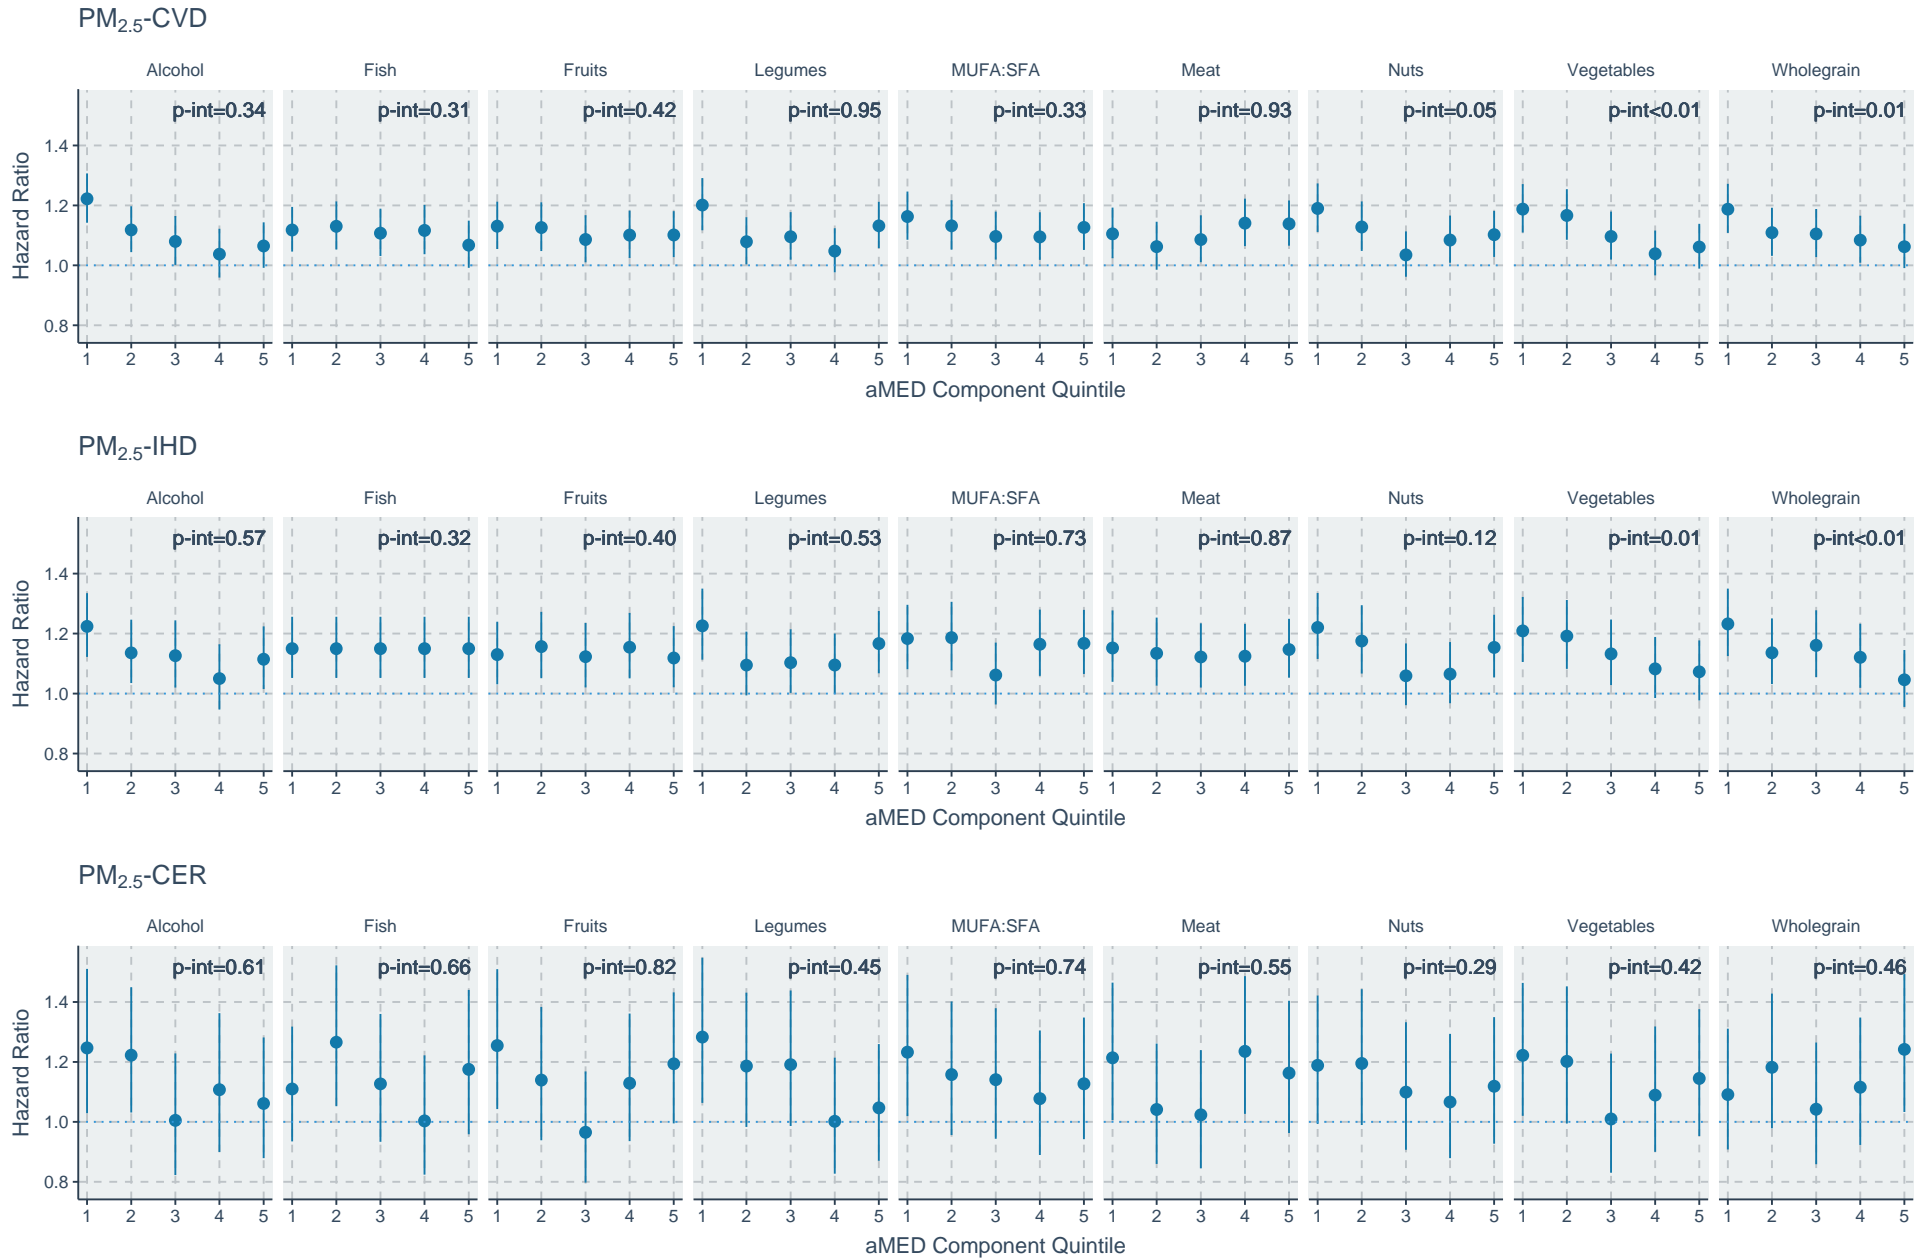

### NO<sub>2</sub>-CVD

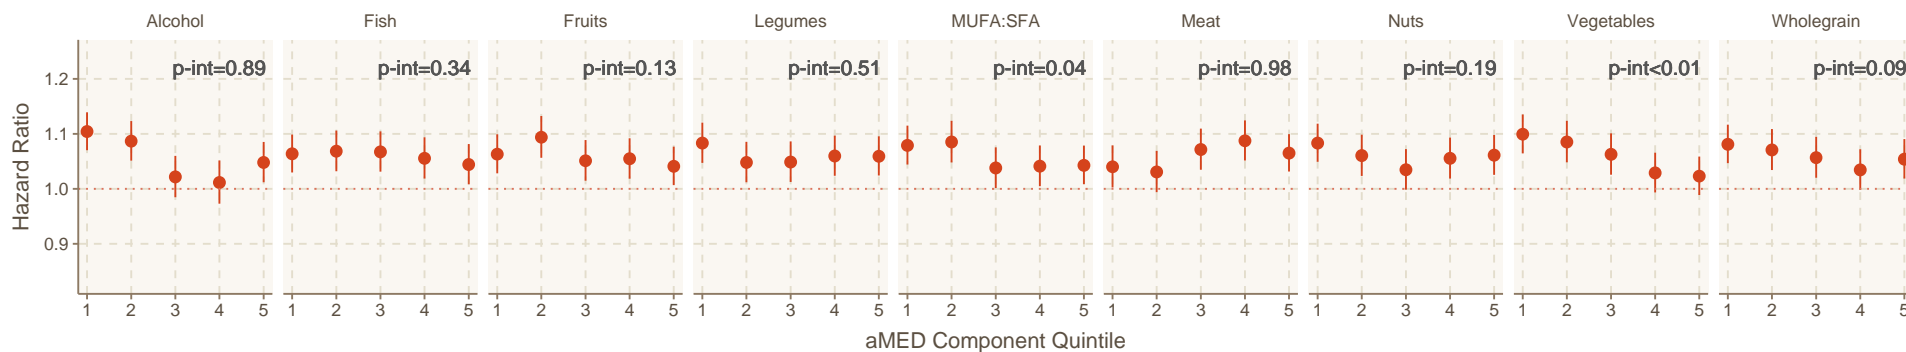

### NO<sub>2</sub>-IHD

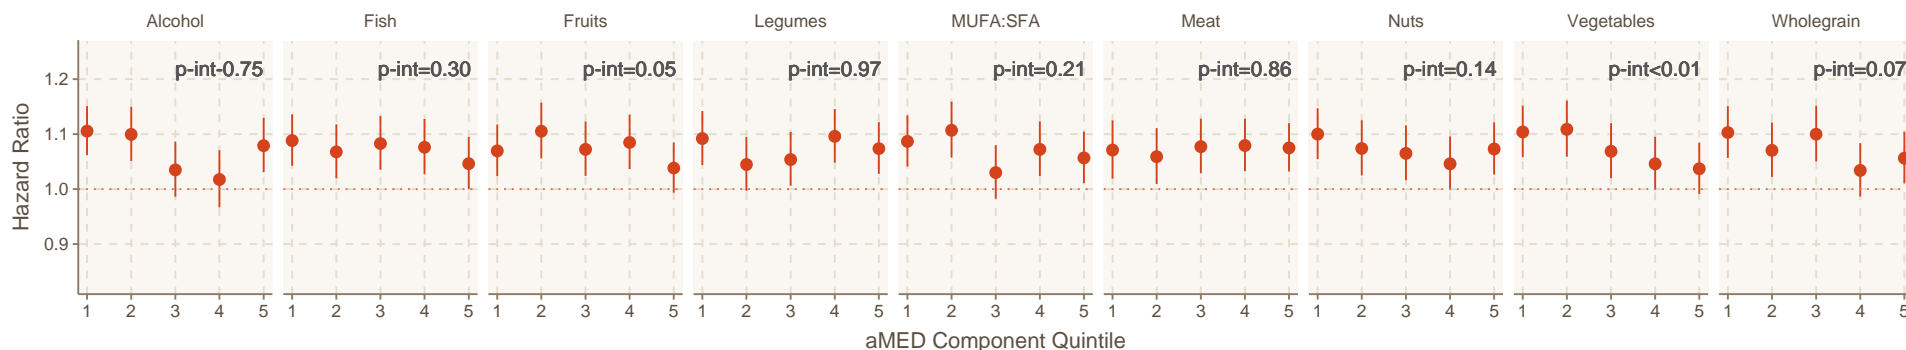

### NO<sub>2</sub>-CER

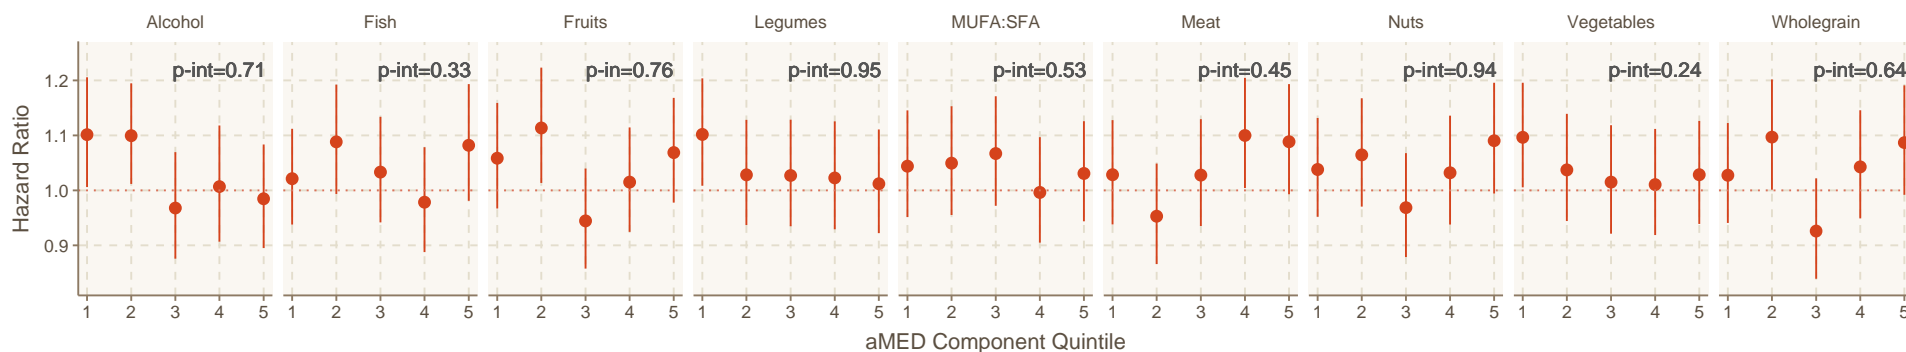

Adjusted for sex and location as strata; and age (time-varying), race, BMI, education, smoking, marriage, and remaining dietary components at individual-level; and median income and % with high school education at census-tract level.

CVD indicates cardiovascular disease; IHD, ischemic heart disease; CER, cerebrovascular disease; and CAR, cardiac arrests

Supplemental Table 1: Results for the penalized ridge regression model, adjusting for both PM<sub>2.5</sub> and NO<sub>2</sub> within the same model

|                         | PM <sub>2.5</sub> | NO <sub>2</sub>  |
|-------------------------|-------------------|------------------|
| Cause of Death          | HR (95% CI)*      | HR (95% CI)*     |
| Cardiovascular Disease  | 1.05 (1.01-1.09)  | 1.03 (1.01-1.05) |
| Ischemic Heart Disease  | 1.06 (1.00-1.11)  | 1.04 (1.05-1.06) |
| Cerebrovascular Disease | 1.08 (0.98-1.20)  | 1.01 (0.96-1.05) |

\*Adjusted for sex and location as strata; and age (time-varying), race, BMI, education, smoking, marriage, and alternative Mediterranean Diet Index (aMED) at individual-level; and median income and % with high school education at census-tract level.

Supplemental Table 2. Cause-specific HR and 95% CI (per  $\mu\text{g}/\text{m}^3$  for  $\text{PM}_{2.5}$ ; per 10 ppb for  $\text{NO}_2$ ) associated with air pollutants by quintiles of alternative Mediterranean Diet Index (aMED) scores

| Cause of Death | aMED Quintile | Deaths (n) | $\text{PM}_{2.5}$ |           |       | $\text{NO}_2$ |           |       |
|----------------|---------------|------------|-------------------|-----------|-------|---------------|-----------|-------|
|                |               |            | HR*               | 95% CI    | p-int | HR*           | 95% CI    | p-int |
| CVD            | 1             | 8383       | 1.20              | 1.12-1.29 | <0.01 | 1.10          | 1.06-1.13 | <0.01 |
|                | 2             | 7362       | 1.21              | 1.12-1.30 |       | 1.10          | 1.06-1.14 |       |
|                | 3             | 8191       | 1.14              | 1.07-1.23 |       | 1.08          | 1.05-1.12 |       |
|                | 4             | 7494       | 1.11              | 1.03-1.19 |       | 1.03          | 0.99-1.06 |       |
|                | 5             | 8102       | 1.01              | 0.94-1.08 |       | 1.01          | 0.97-1.04 |       |
| IHD            | 1             | 4674       | 1.19              | 1.09-1.31 | <0.01 | 1.10          | 1.05-1.15 | <0.01 |
|                | 2             | 4066       | 1.28              | 1.16-1.41 |       | 1.12          | 1.07-1.18 |       |
|                | 3             | 4622       | 1.19              | 1.08-1.30 |       | 1.09          | 1.04-1.14 |       |
|                | 4             | 4274       | 1.18              | 1.07-1.30 |       | 1.06          | 1.01-1.11 |       |
|                | 5             | 4693       | 1.02              | 0.93-1.12 |       | 1.02          | 0.97-1.06 |       |
| CER            | 1             | 1171       | 1.26              | 1.05-1.52 | <0.01 | 1.08          | 0.99-1.18 | 0.01  |
|                | 2             | 1053       | 1.23              | 1.01-1.49 |       | 1.07          | 0.97-1.17 |       |
|                | 3             | 1138       | 1.31              | 1.09-1.57 |       | 1.12          | 1.02-1.23 |       |
|                | 4             | 1049       | 1.06              | 0.88-1.29 |       | 1.01          | 0.92-1.11 |       |
|                | 5             | 1181       | 0.95              | 0.79-1.14 |       | 0.93          | 0.85-1.02 |       |
| CAR            | 1             | 1454       | 1.11              | 0.93-1.33 | 0.09  | 1.06          | 0.97-1.15 | 0.13  |
|                | 2             | 1305       | 1.08              | 0.89-1.29 |       | 1.06          | 0.97-1.16 |       |
|                | 3             | 1441       | 0.95              | 0.78-1.13 |       | 1.02          | 0.93-1.11 |       |
|                | 4             | 1282       | 0.93              | 0.78-1.12 |       | 0.97          | 0.88-1.06 |       |
|                | 5             | 1329       | 0.95              | 0.79-1.13 |       | 0.99          | 0.92-1.09 |       |

\*Adjusted for sex and location as strata; and age (time-varying), race, BMI, education, smoking, and marriage at individual-level; and median income and % with high school education at census-tract level.

CVD indicates cardiovascular disease; IHD, ischemic heart disease; CER, cerebrovascular disease; CAR, cardiac arrests

Supplemental Table 3: Air pollution-mortality associations and p-values for interaction test between air pollutant and alternative Mediterranean Diet Index (aMED) variable across different groups of BMI, education, and smoking

|                                    | Cardiovascular Disease (CVD) |                         |               |                         |               | Ischemic Heart Disease (IHD) |                         |               |                         |               | Cerebrovascular Disease (CER) |                         |               |                         |               |
|------------------------------------|------------------------------|-------------------------|---------------|-------------------------|---------------|------------------------------|-------------------------|---------------|-------------------------|---------------|-------------------------------|-------------------------|---------------|-------------------------|---------------|
|                                    | Deaths<br>(n)                | PM <sub>2.5</sub> -CVD  |               | NO <sub>2</sub> -CVD    |               | Deaths<br>(n)                | PM <sub>2.5</sub> -IHD  |               | NO <sub>2</sub> -IHD    |               | Deaths<br>(n)                 | PM <sub>2.5</sub> -CER  |               | NO <sub>2</sub> -CER    |               |
|                                    |                              | HR<br>(95%<br>CI)*      | aMED<br>p-int | HR<br>(95%<br>CI)*      | aMED<br>p-int |                              | HR<br>(95%<br>CI)*      | aMED<br>p-int | HR<br>(95%<br>CI)*      | aMED<br>p-int |                               | HR<br>(95%<br>CI)*      | aMED<br>p-int | HR<br>(95%<br>CI)*      | aMED<br>p-int |
| <b>BMI</b>                         |                              |                         |               |                         |               |                              |                         |               |                         |               |                               |                         |               |                         |               |
| <25 (N=189,047)                    | 11,196                       | 1.15<br>(1.06-<br>1.24) | <0.01         | 1.08<br>(1.04-<br>1.12) | <0.01         | 5,967                        | 1.24<br>(1.11-<br>1.37) | 0.28          | 1.12<br>(1.07-<br>1.18) | 0.05          | 1,889                         | 0.98<br>(0.81-<br>1.19) | 0.05          | 0.97<br>(0.97-<br>1.20) | 0.04          |
| 25-30 (N=226,854)                  | 15,918                       | 1.17<br>(1.10-<br>1.25) | <0.01         | 1.07<br>(1.03-<br>1.10) | <0.01         | 9,251                        | 1.21<br>(1.11-<br>1.32) | 0.05          | 1.08<br>(1.03-<br>1.12) | 0.09          | 2,238                         | 1.29<br>(1.07-<br>1.54) | 0.18          | 1.07<br>(0.98-<br>1.16) | 0.62          |
| >=30 (N=118,149)                   | 11,090                       | 1.06<br>(0.98-<br>1.15) | 0.28          | 1.05<br>(1.01-<br>1.08) | 0.15          | 6,393                        | 1.02<br>(0.92-<br>1.14) | 0.15          | 1.03<br>(0.98-<br>1.08) | 0.07          | 1,257                         | 1.20<br>(0.95-<br>1.50) | 0.29          | 1.08<br>(0.97-<br>1.20) | 0.14          |
| <b>Education Level</b>             |                              |                         |               |                         |               |                              |                         |               |                         |               |                               |                         |               |                         |               |
| High school or less<br>(N=321,510) | 25,594                       | 1.11<br>(1.03-<br>1.20) | <0.01         | 1.05<br>(1.01-<br>1.09) | <0.01         | 14,483                       | 1.17<br>(1.09-<br>1.26) | 0.02          | 1.08<br>(1.05-<br>1.12) | 0.01          | 2,228                         | 1.15<br>(0.96-<br>1.38) | 0.27          | 1.06<br>(0.99-<br>1.13) | 0.14          |
| College or greater<br>(N=210,745)  | 12,319                       | 1.13<br>(1.07-<br>1.19) | 0.03          | 1.06<br>(1.04-<br>1.09) | 0.03          | 6,938                        | 1.16<br>(1.05-<br>1.28) | 0.28          | 1.07<br>(1.02-<br>1.12) | 0.15          | 3,137                         | 1.10<br>(0.95-<br>1.27) | <0.01         | 0.99<br>(0.91-<br>1.08) | 0.01          |
| <b>Smoking History</b>             |                              |                         |               |                         |               |                              |                         |               |                         |               |                               |                         |               |                         |               |
| Never (N=191,039)                  | 9,737                        | 1.17<br>(1.07-<br>1.27) | <0.01         | 1.07<br>(1.03-<br>1.11) | <0.01         | 5,102                        | 1.21<br>(1.08-<br>1.36) | <0.1          | 1.10<br>(1.04-<br>1.16) | 0.03          | 1,623                         | 1.23<br>(1.01-<br>1.51) | 0.74          | 1.05<br>(0.95-<br>1.15) | 0.71          |
| Ever (N=271,381)                   | 21,291                       | 1.12<br>(1.06-<br>1.19) | <0.01         | 1.07<br>(1.04-<br>1.10) | <0.01         | 12,392                       | 1.15<br>(1.07-<br>1.24) | 0.23          | 1.08<br>(1.04-<br>1.12) | 0.02          | 2,823                         | 1.13<br>(0.96-<br>1.32) | 0.01          | 1.05<br>(0.98-<br>1.13) | <0.01         |
| Current (N=65,463)                 | 6,604                        | 1.08<br>(0.98-<br>1.19) | 0.08          | 1.04<br>(0.99-<br>1.09) | 0.09          | 3,740                        | 1.13<br>(0.99-<br>1.28) | 0.50          | 1.07<br>(0.99-<br>1.13) | 0.32          | 877                           | 1.06<br>(0.81-<br>1.39) | 0.08          | 1.03<br>(0.91-<br>1.16) | 0.08          |

\*Adjusted for sex and location as strata; and age (time-varying), race, BMI, education, smoking, marriage at individual-level; and median income and % with high school education at census-tract level



Supplemental Table 4: Air pollution-mortality associations and p-values for interaction between air pollutant and alternative Mediterranean Diet Index (aMED) variable across quartiles of census-tract population density

| Population Density     | PM <sub>2.5</sub> Avg (SD) | NO <sub>2</sub> Avg (SD) | Deaths (n) | Cardiovascular Disease (CVD) |            |                      |            | Ischemic Heart Disease (IHD) |                  |                      |                  | Cerebrovascular Disease (CER) |            |                      |            |                  |      |
|------------------------|----------------------------|--------------------------|------------|------------------------------|------------|----------------------|------------|------------------------------|------------------|----------------------|------------------|-------------------------------|------------|----------------------|------------|------------------|------|
|                        |                            |                          |            | PM <sub>2.5</sub> -CVD       |            | NO <sub>2</sub> -CVD |            | PM <sub>2.5</sub> -IHD       |                  | NO <sub>2</sub> -IHD |                  | PM <sub>2.5</sub> -CER        |            | NO <sub>2</sub> -CER |            |                  |      |
|                        |                            |                          |            | HR (95% CI)*                 | aMED p-int | HR (95% CI)*         | aMED p-int | HR (95% CI)*                 | aMED p-int       | HR (95% CI)*         | aMED p-int       | HR (95% CI)*                  | aMED p-int | HR (95% CI)*         | aMED p-int |                  |      |
| Quartile 1 (N=137,212) | 11.0 (2.6)                 | 7.7 (3.6)                | 9,871      | 1.05 (0.94-1.17)             | 0.12       | 1.08 (0.99-1.18)     | 0.06       | 5,557                        | 1.09 (0.94-1.27) | 0.39                 | 1.12 (1.01-1.25) | 0.17                          | 1,419      | 1.25 (0.94-1.68)     | <0.01      | 1.12 (0.89-1.40) | 0.04 |
| Quartile 2 (N=137,211) | 12.5 (2.7)                 | 12.2 (4.6)               | 9,295      | 0.97 (0.87-1.09)             | 0.82       | 1.02 (0.96-1.09)     | 0.18       | 5,204                        | 1.07 (0.92-1.24) | 0.99                 | 1.11 (1.01-1.21) | 0.72                          | 1,343      | 0.78 (0.57-1.06)     | 0.58       | 0.87 (0.73-1.05) | 0.33 |
| Quartile 3 (N=137,211) | 13.4 (3.0)                 | 16.0 (5.6)               | 9,857      | 1.16 (1.05-1.29)             | 0.04       | 1.07 (1.01-1.14)     | 0.05       | 5,627                        | 1.15 (1.00-1.31) | 0.29                 | 1.06 (0.99-1.15) | 0.27                          | 1,385      | 1.24 (0.95-1.61)     | 0.39       | 1.16 (1.00-1.35) | 0.10 |
| Quartile 4 (N=137,211) | 15.0 (3.0)                 | 22.6 (6.8)               | 10,509     | 1.19 (1.09-1.29)             | 0.01       | 1.05 (1.01-1.09)     | 0.01       | 5,941                        | 1.24 (1.10-1.39) | 0.06                 | 1.08 (1.02-1.13) | 0.06                          | 1,445      | 1.31 (1.04-1.65)     | 0.38       | 1.02 (0.92-1.14) | 0.35 |

\*Adjusted for sex and location as strata; and age (time-varying), race, BMI, education, smoking, marriage at individual-level; and median income and % with high school education at census-tract level

Supplemental Table 5: E-values for cardiovascular disease causes of mortality associated with long-term exposure to PM<sub>2.5</sub> and NO<sub>2</sub>

|                         | PM <sub>2.5</sub>                    | NO <sub>2</sub>                      |
|-------------------------|--------------------------------------|--------------------------------------|
| Cause of Death          | E-v alue for point estimate (for CI) | E-v alue for point estimate (for CI) |
| Cardiovascular Disease  | 1.51 (1.37)                          | 1.31 (1.24)                          |
| Ischemic Heart Disease  | 1.59 (1.43)                          | 1.37 (1.24)                          |
| Cerebrovascular Disease | 1.57 (1.21)                          | 1.24 (1.00)                          |
